# Supplementary material
Source: PubMed Central journal article supplement (PMC4243051)

**Figure S1:** Donor age distribution and representative flow cytometry analysis, related to Figures 1, 2

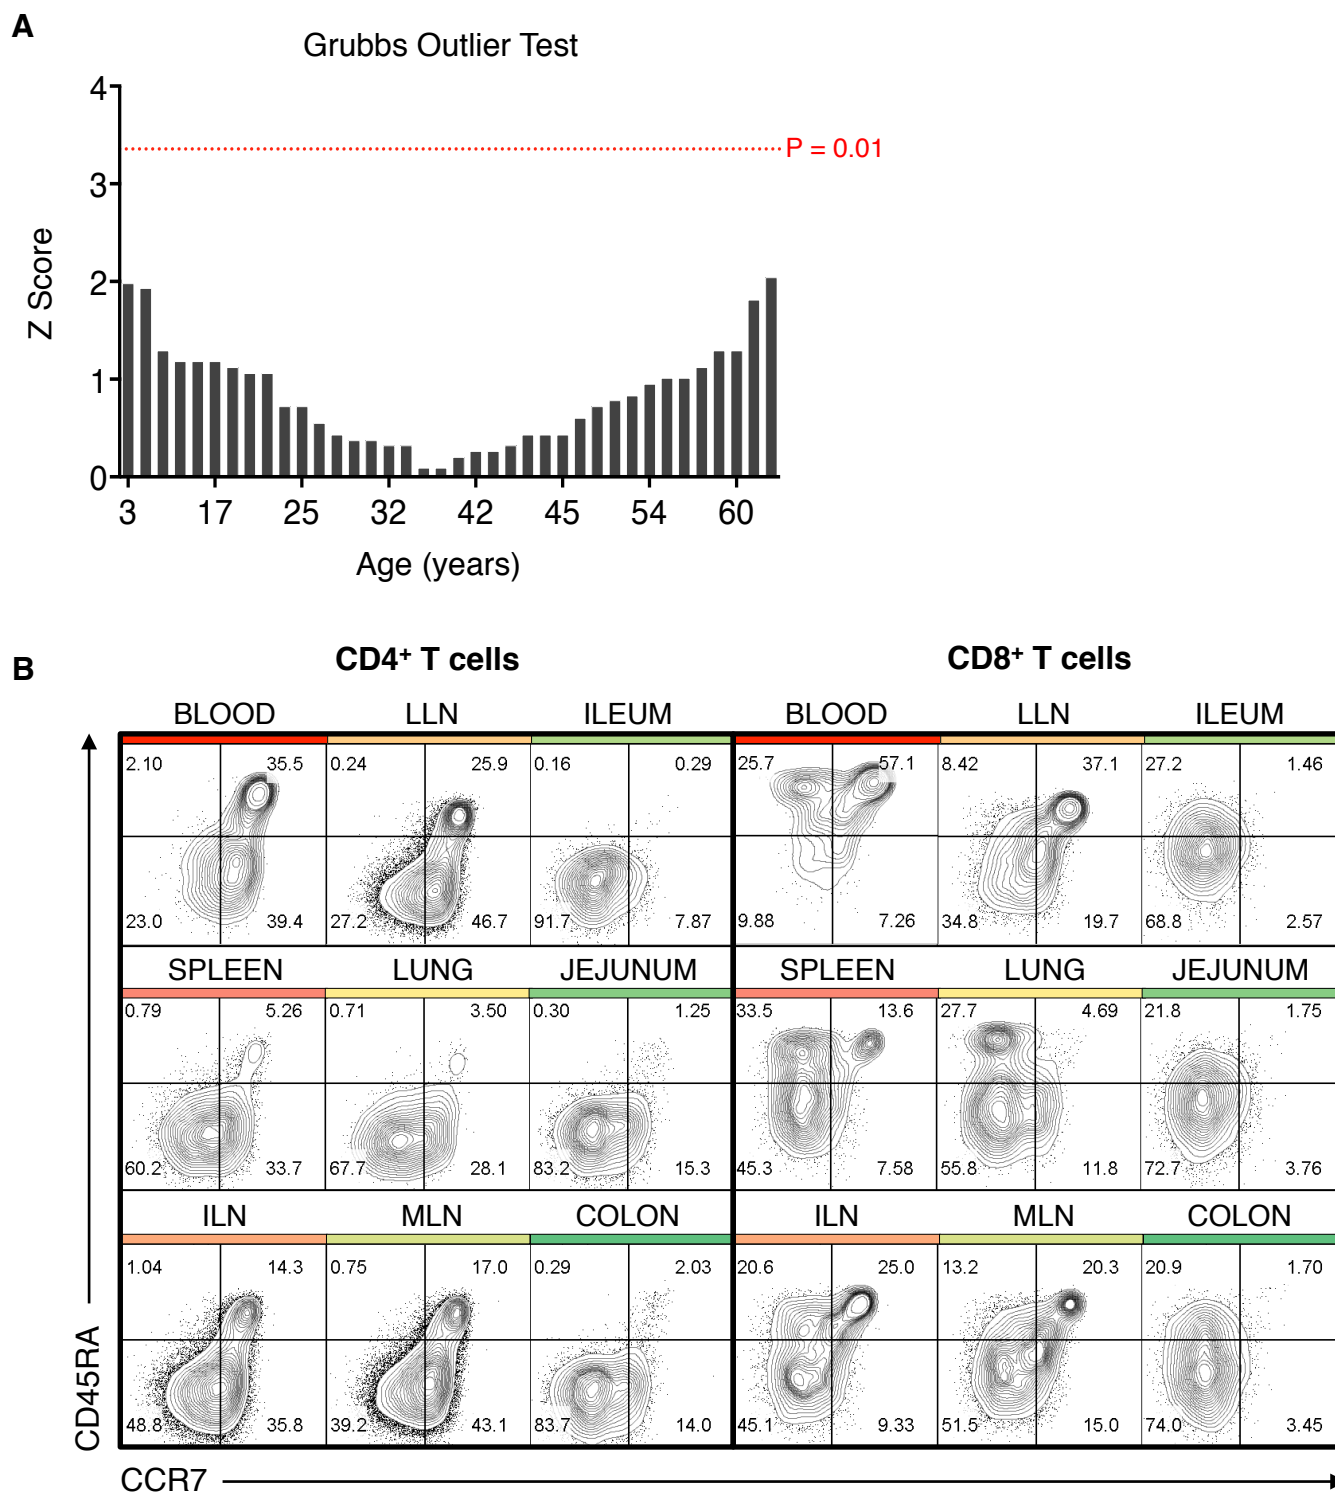

Supplement: NIHMS636153-supplement-1.pdf [file NIHMS636153-supplement-1.pdf]
