# Supplementary material
Source: PubMed Central journal article supplement (PMC4243051)

**Figure S7:** Model of CD4 and CD8 T cell subset differentiation and maintenance, related to all Figures

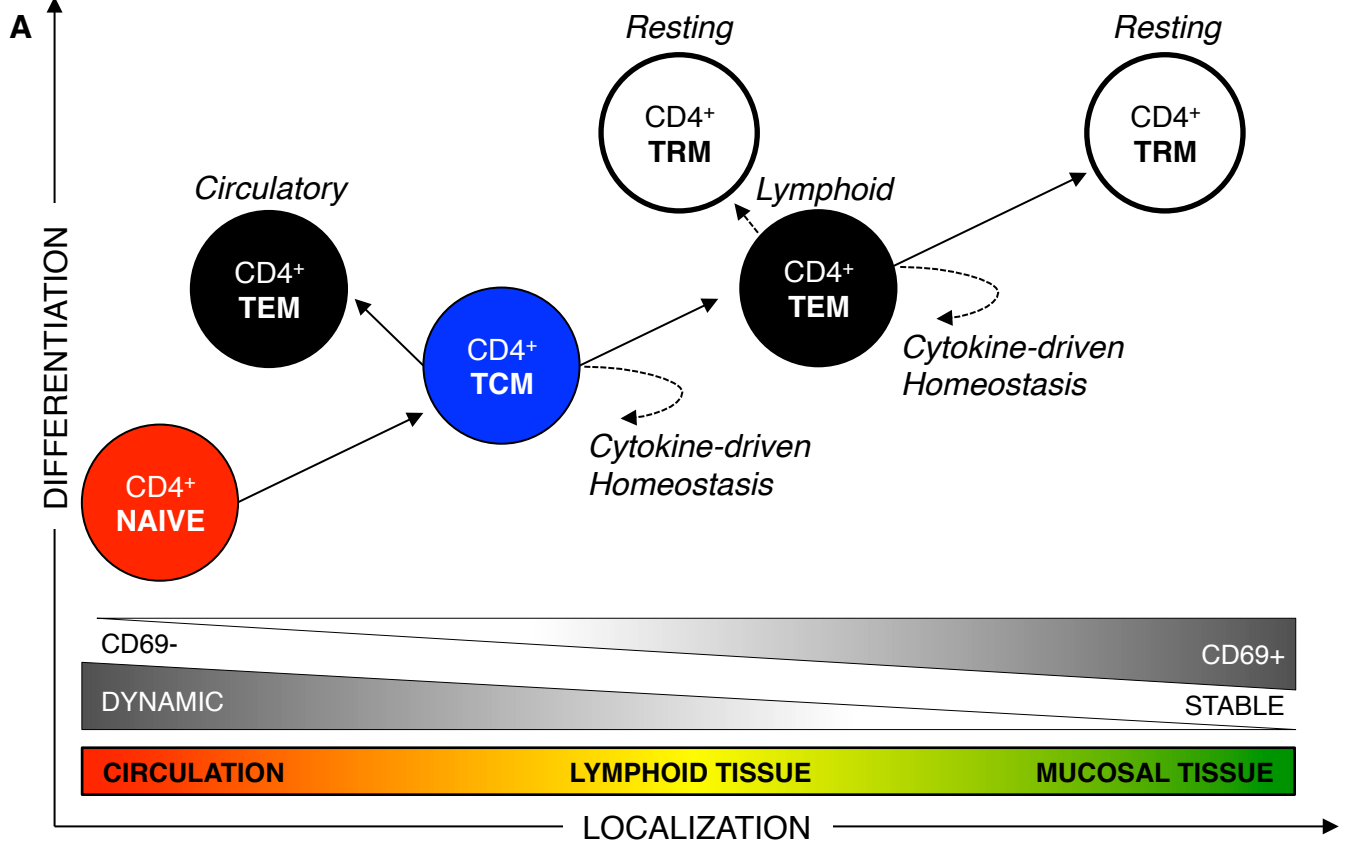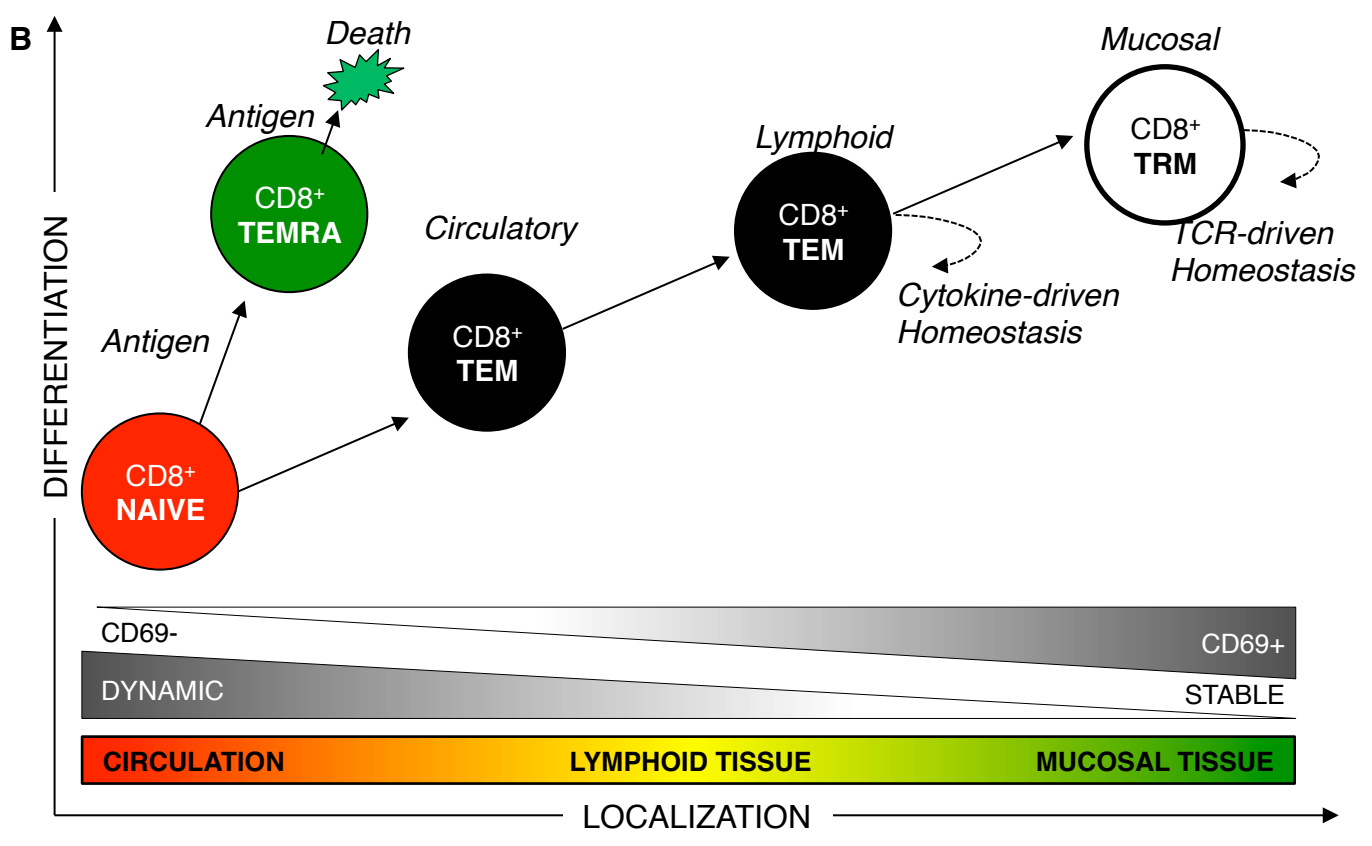

Supplement: NIHMS636153-supplement-7.pdf [file NIHMS636153-supplement-7.pdf]
