# Supplementary material
Source: PubMed Central journal article supplement (PMC4243051)

**Figure S2:** Proliferation of TEM subsets, related to Figures 3,5

**A**

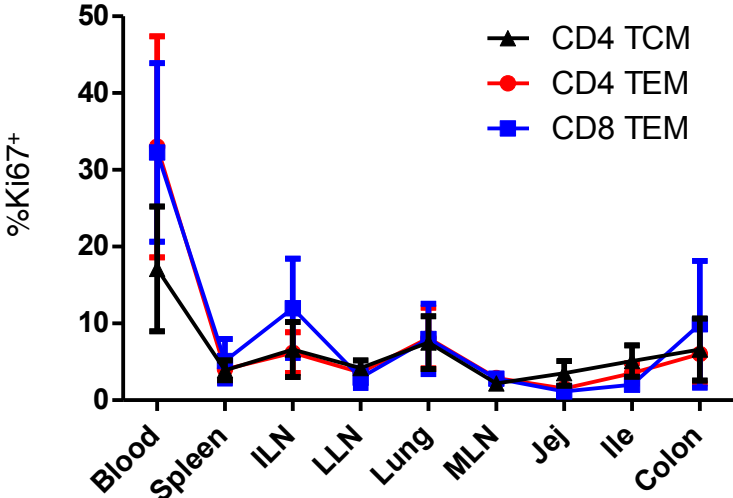

**B**

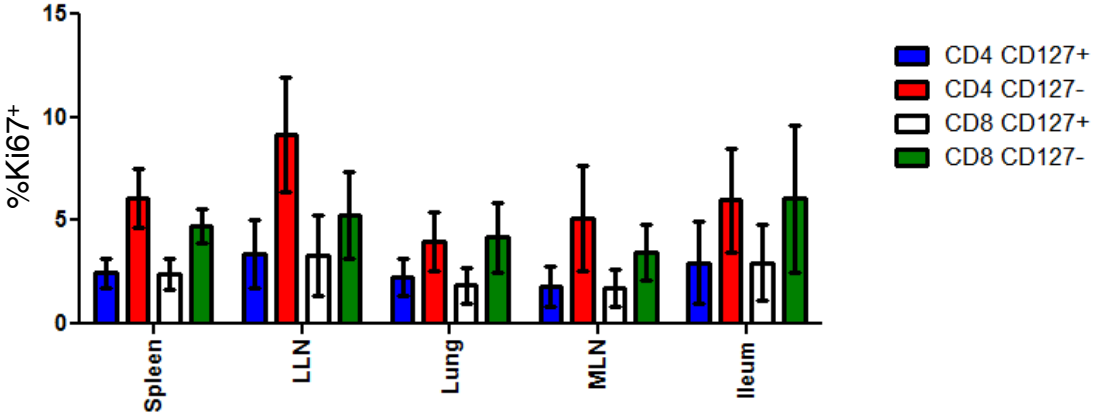

Supplement: NIHMS636153-supplement-2.pdf [file NIHMS636153-supplement-2.pdf]

**Figure S3:** Variations in expression of CD28 and CD127 by subset and tissue sites, related to Figures

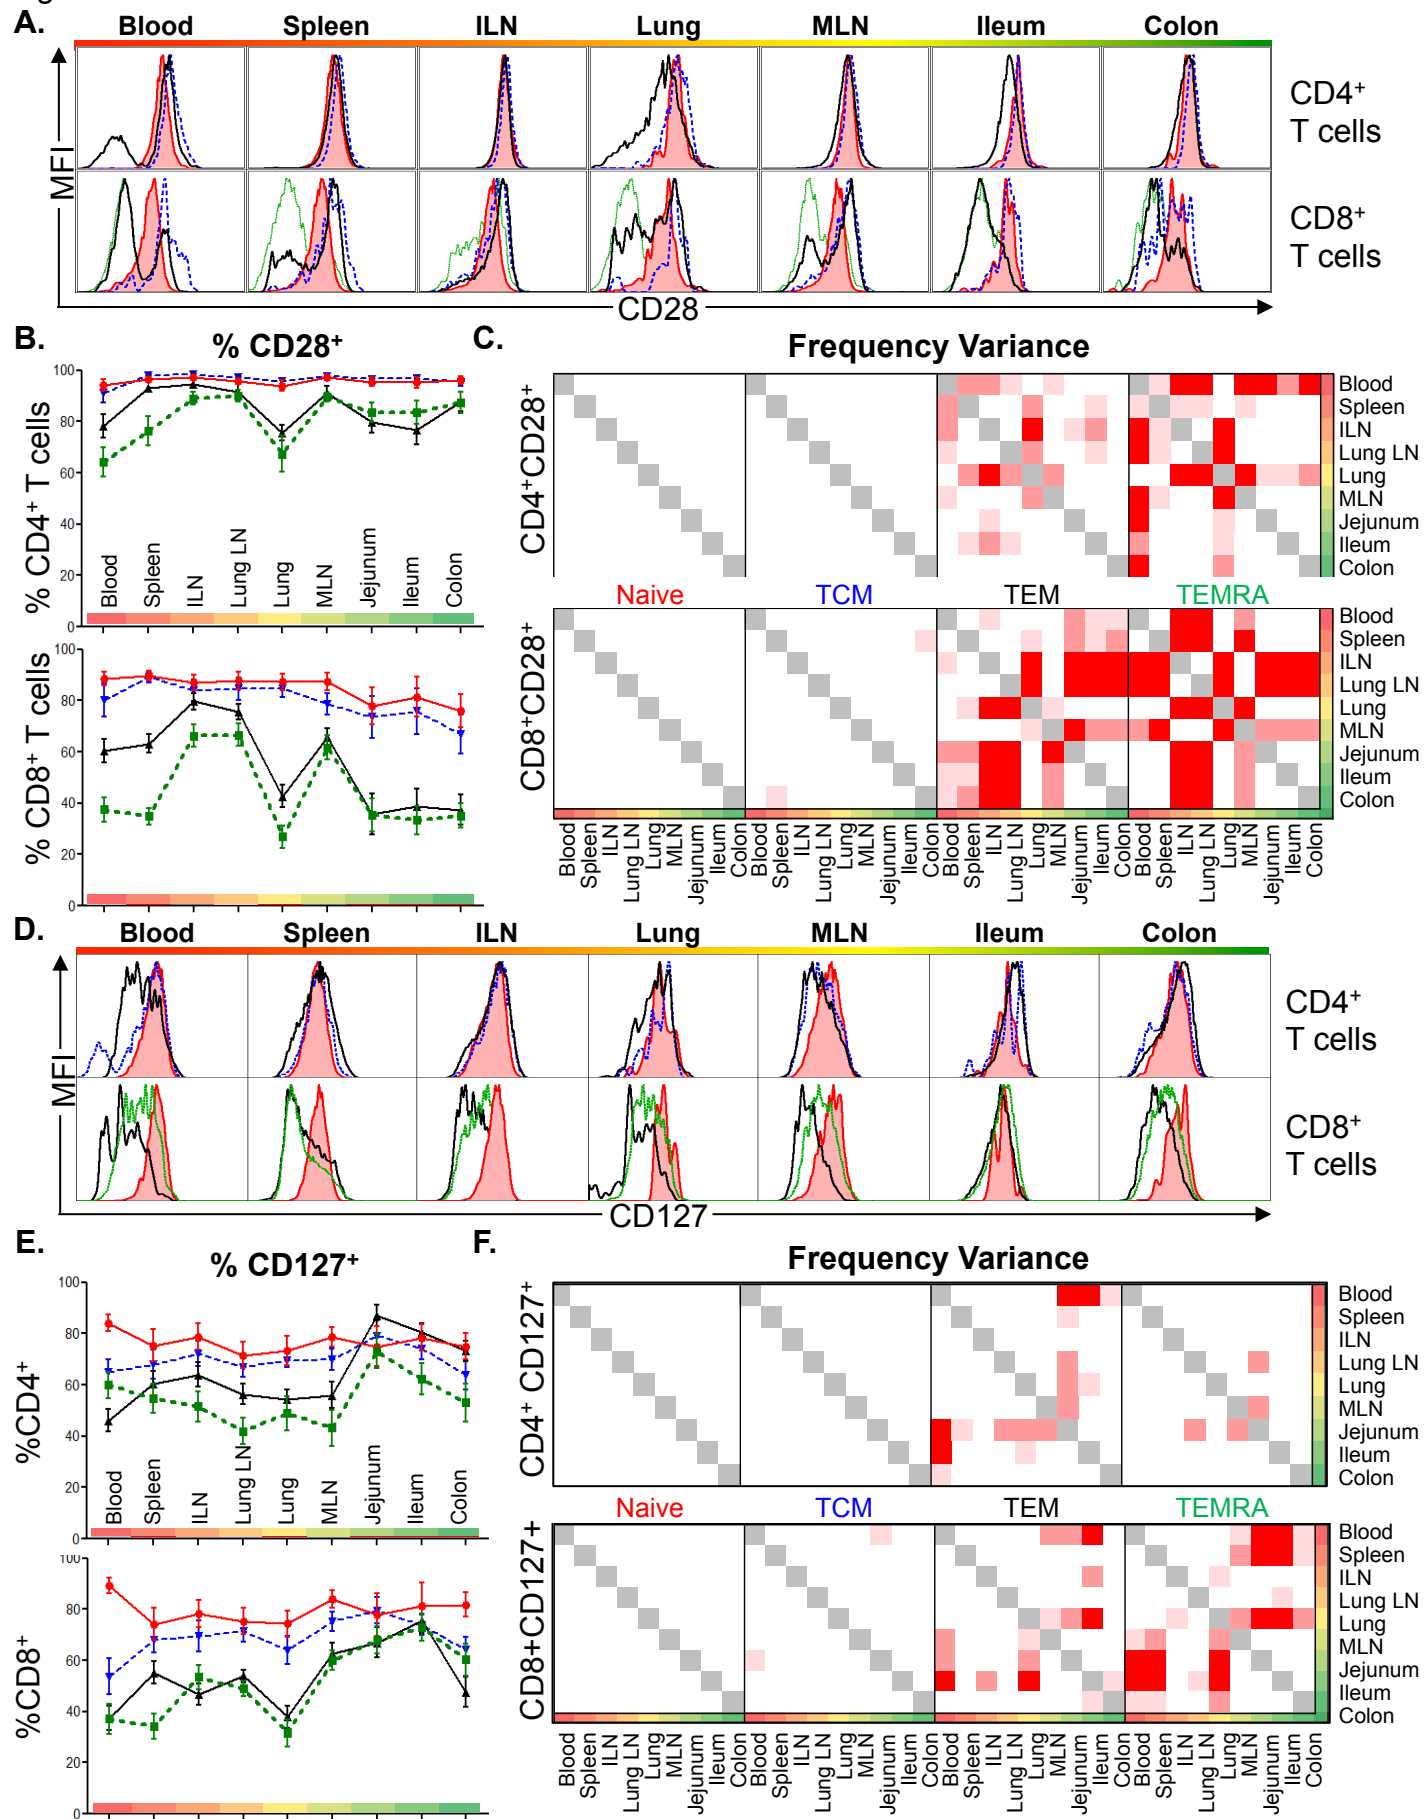

Supplement: NIHMS636153-supplement-3.pdf [file NIHMS636153-supplement-3.pdf]

**Figure S4: Coexpression of CD28 and CD69 by T cell subsets, related to Figures 4,5**

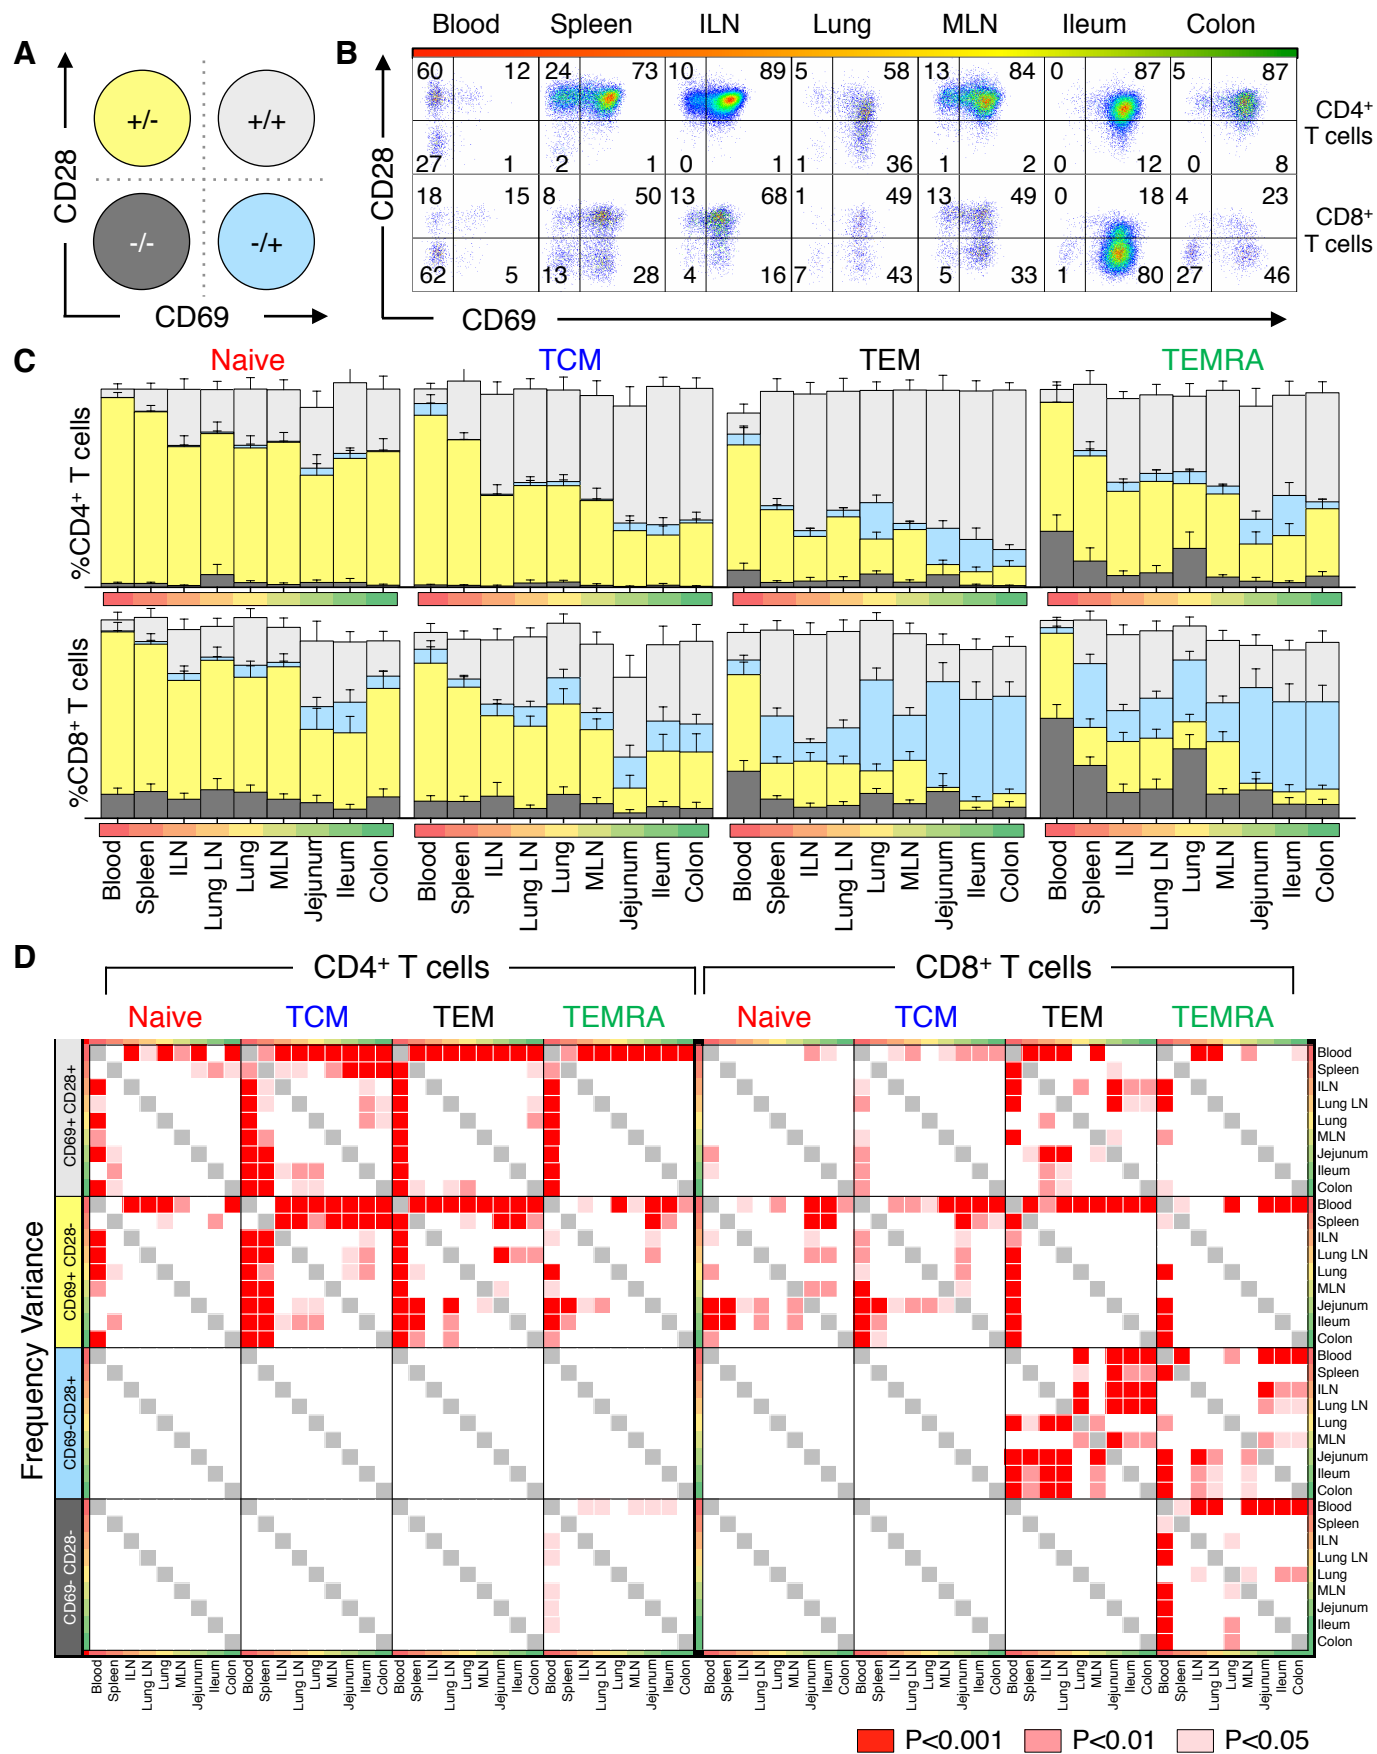

Supplement: NIHMS636153-supplement-4.pdf [file NIHMS636153-supplement-4.pdf]

**Figure S5: Total TCR clone frequency from individual donors, related to Figure 7**

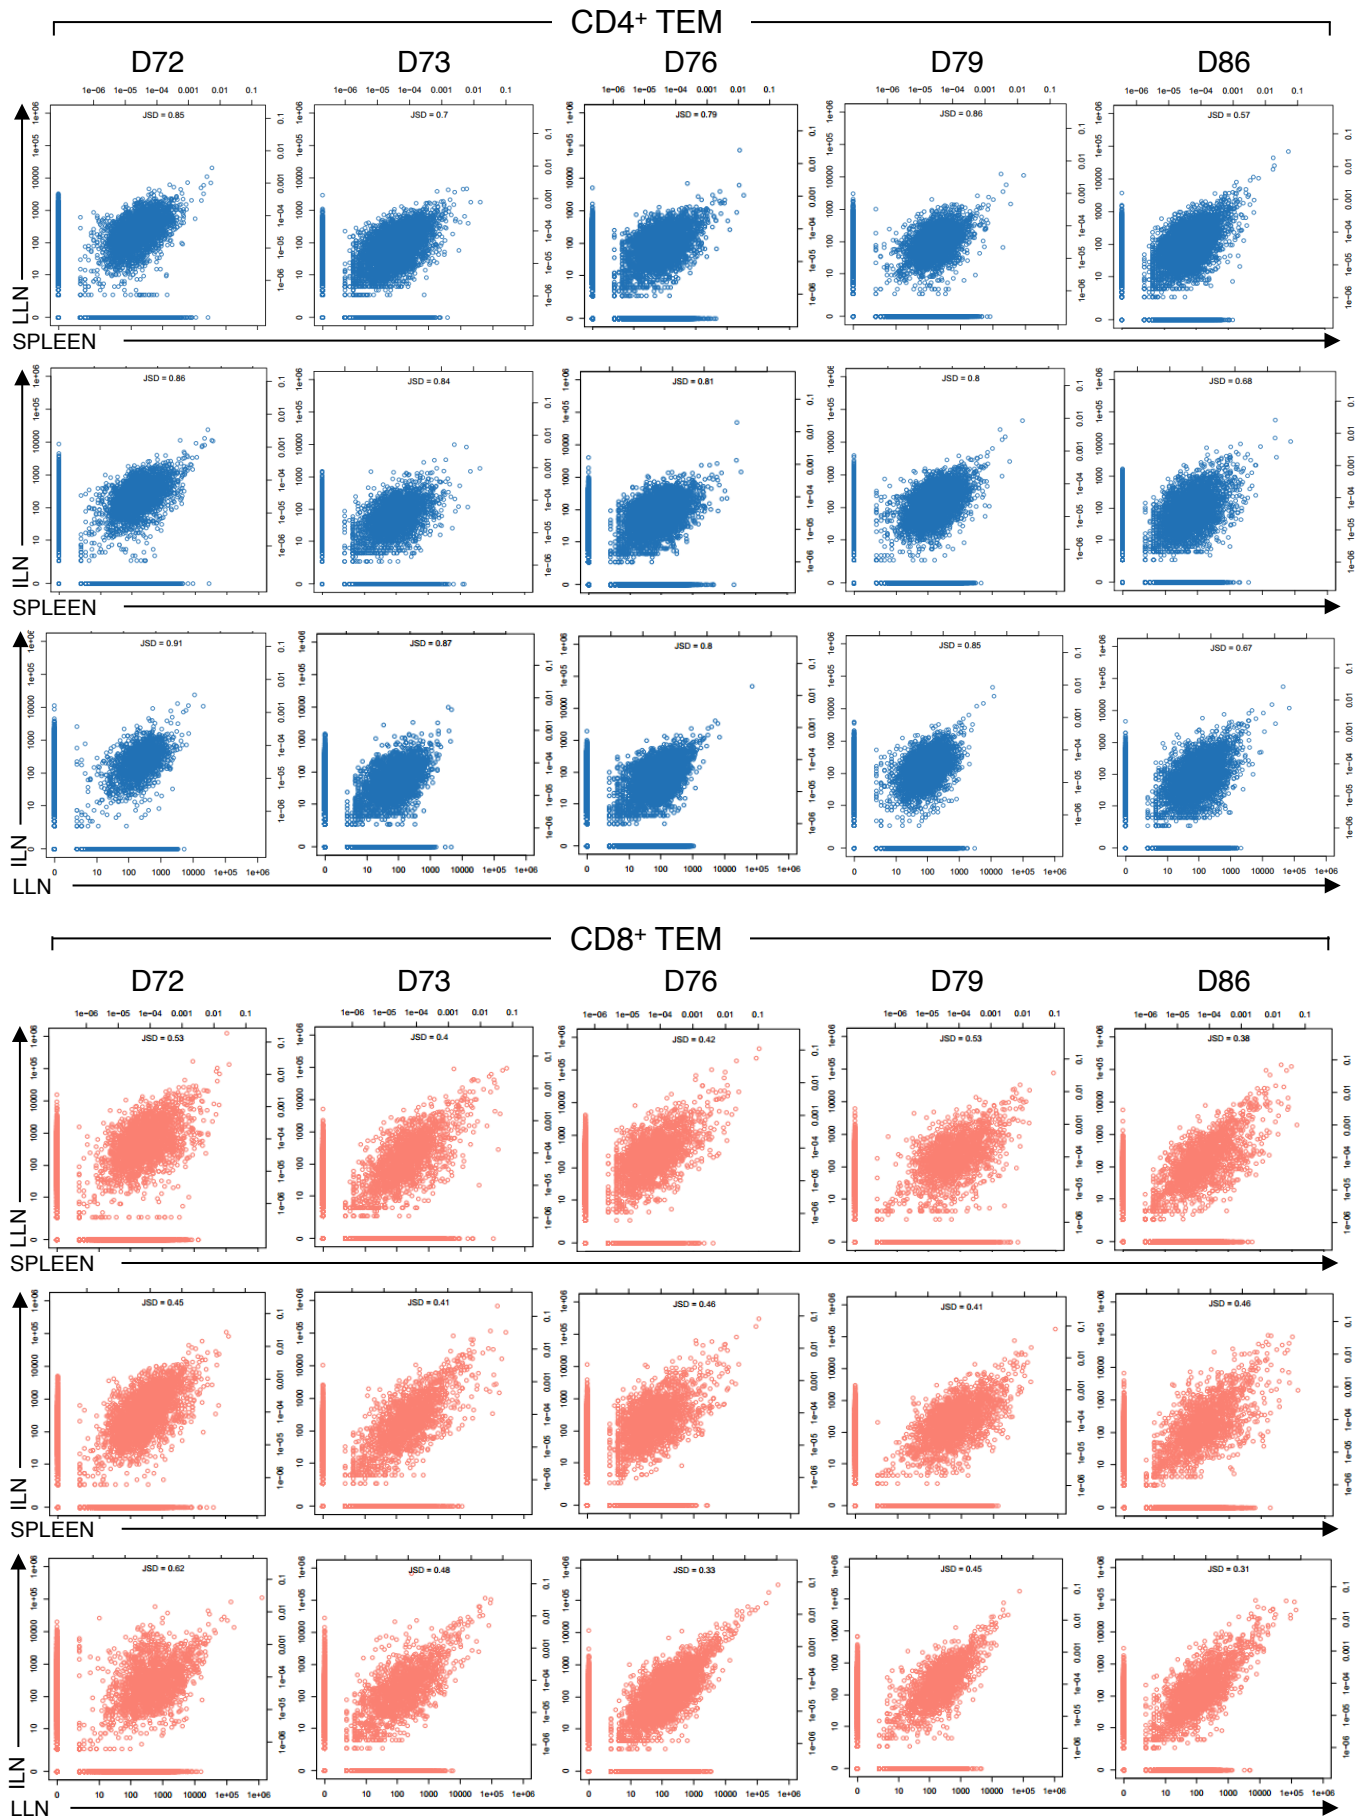

Supplement: NIHMS636153-supplement-5.pdf [file NIHMS636153-supplement-5.pdf]

**Figure S6:** Individual donor and tissue TCR diversity, related to Figure 7

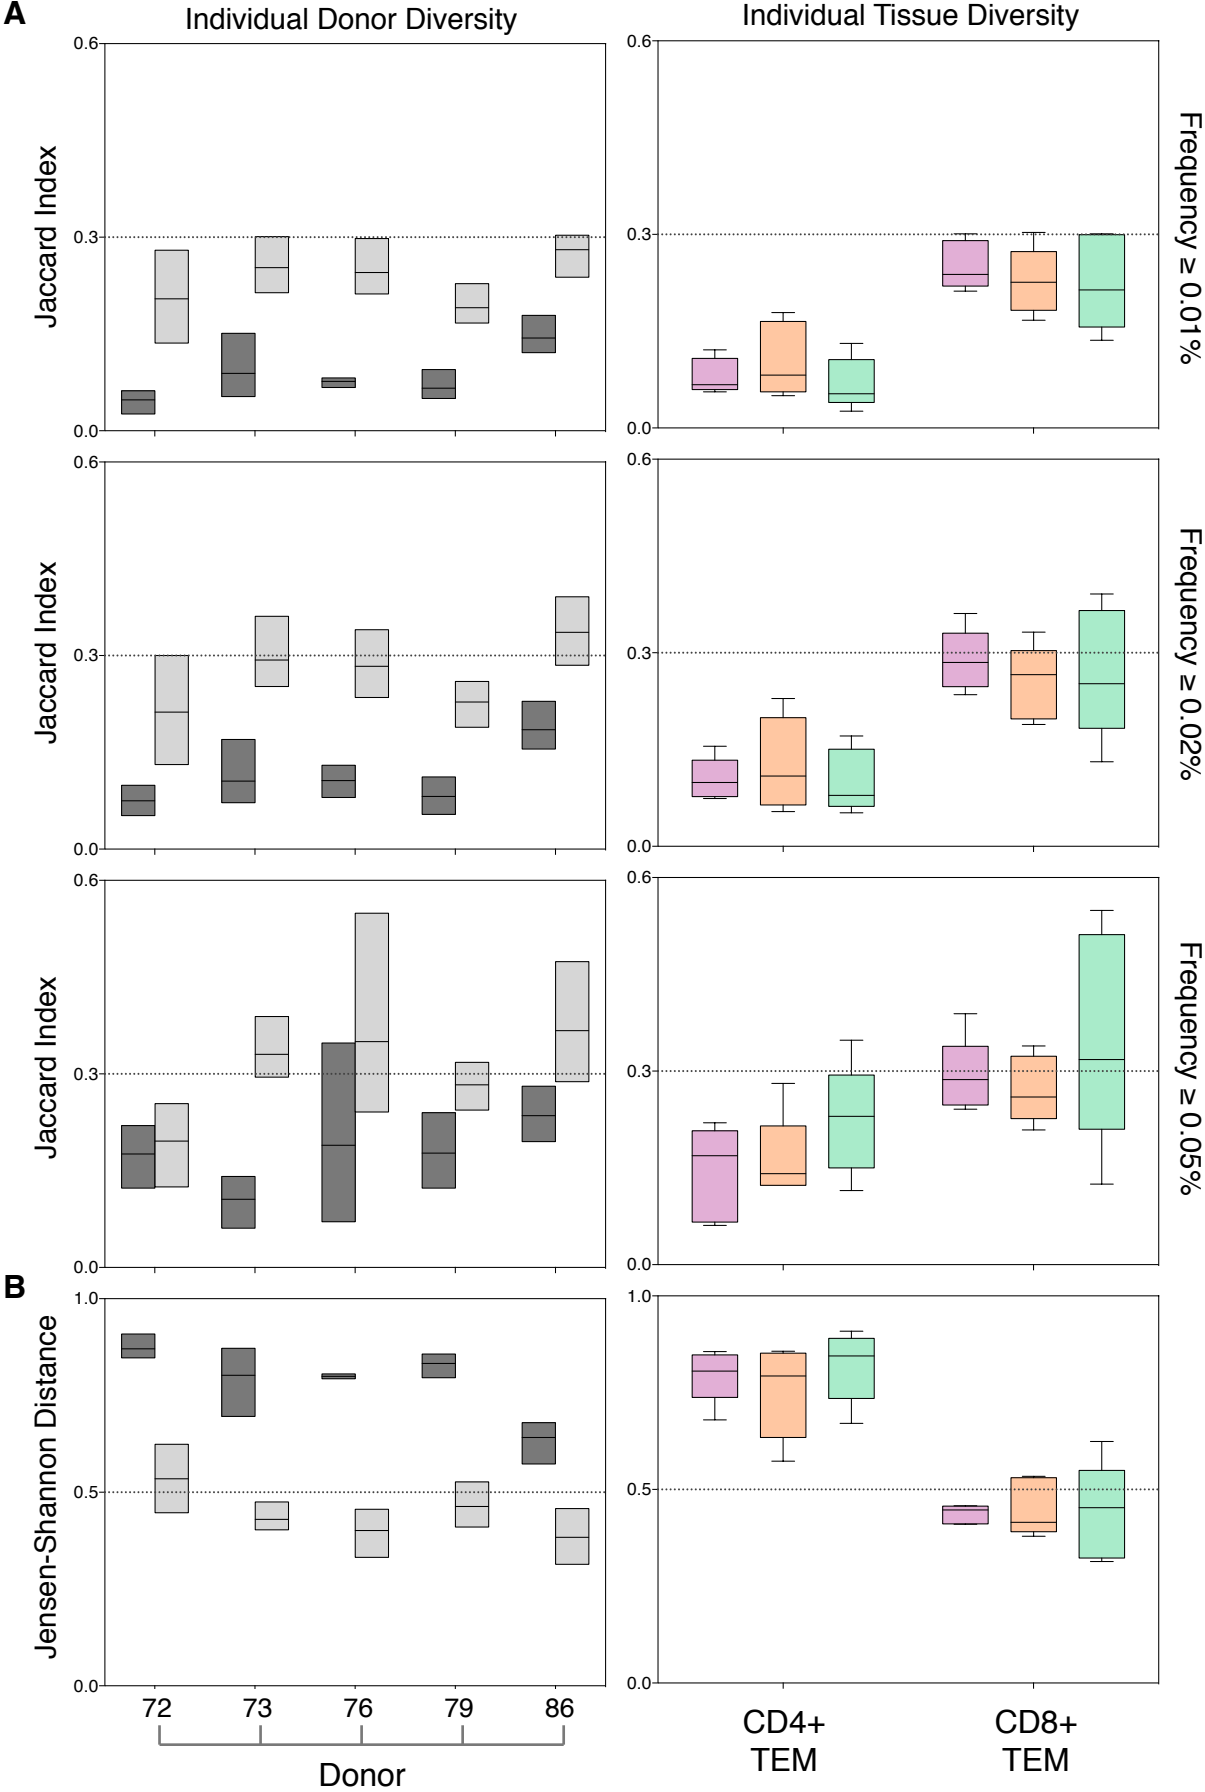

Supplement: NIHMS636153-supplement-6.pdf [file NIHMS636153-supplement-6.pdf]
